# Supplementary material
Source: publisher figshare collection journal article supplement (https://gsapubs.figshare.com/ndownloader/files/22515458)
Supplement: Supplementary file 1 [file 22515458]

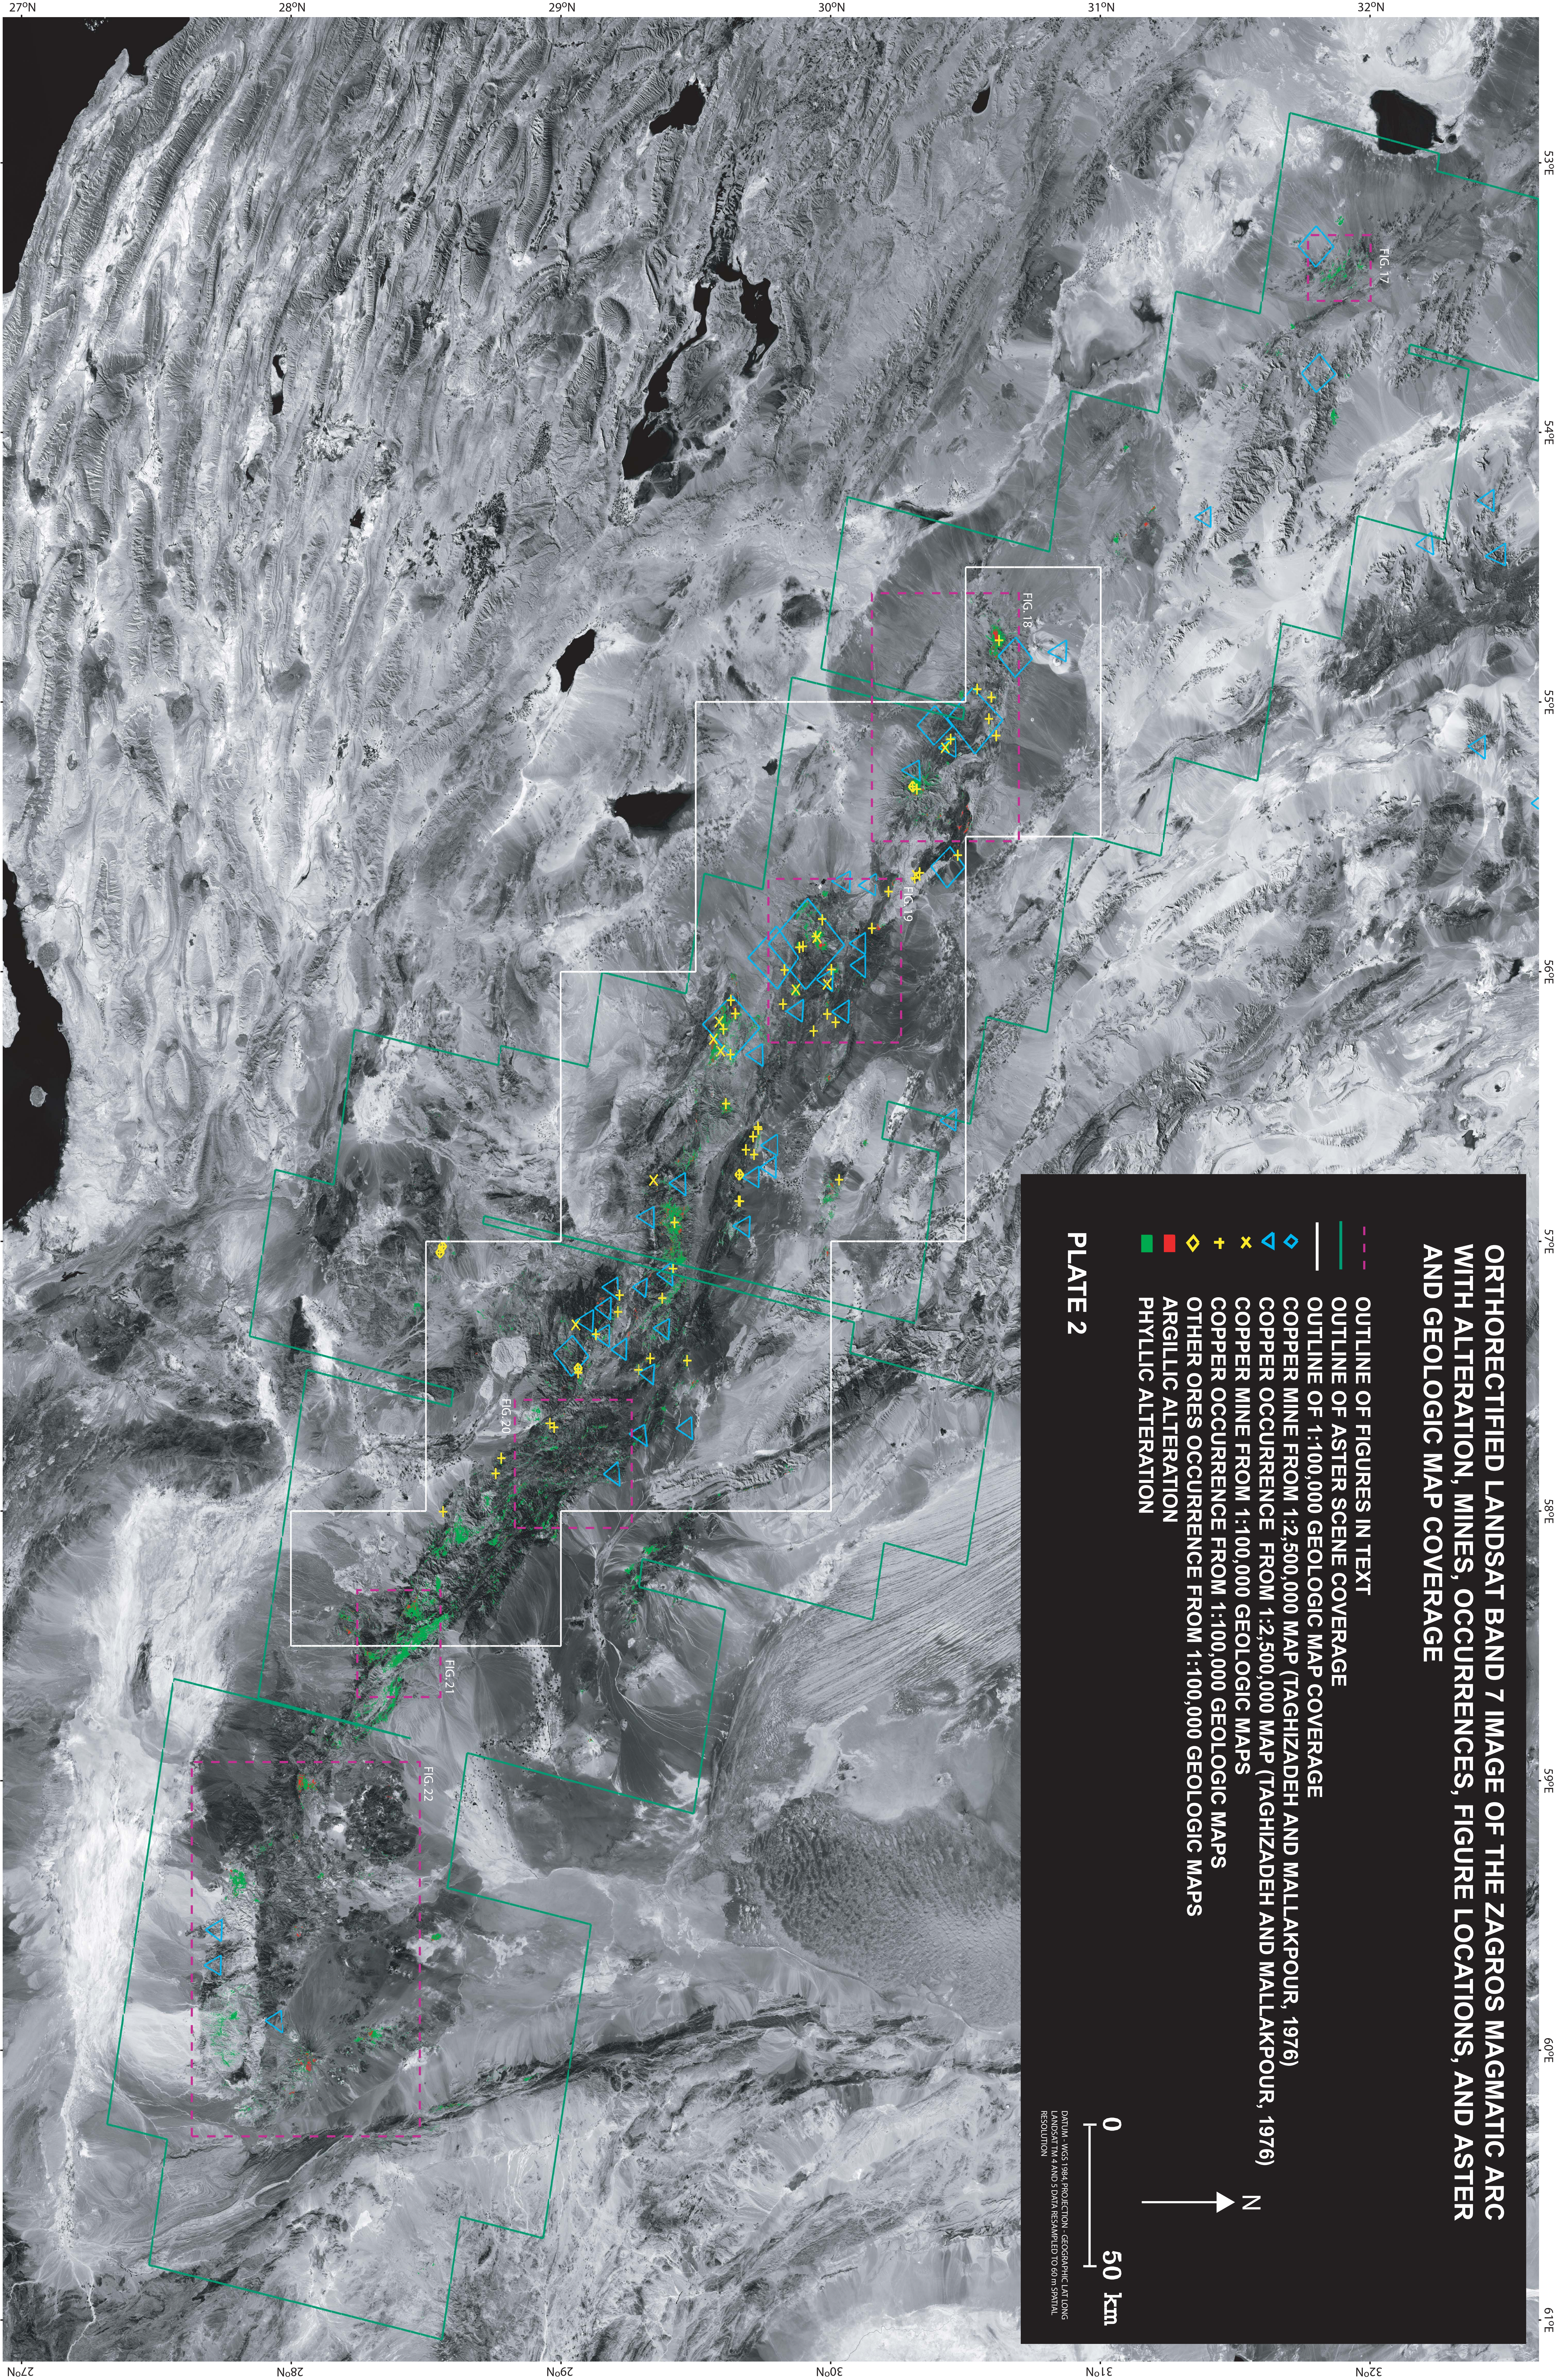

ORTHORECTIFIED LANDSAT BAND 7 IMAGE OF THE ZAGROS MAGMATIC ARC  
WITH ALTERATION, MINES, OCCURRENCES, FIGURE LOCATIONS, AND ASTER  
AND GEOLOGIC MAP COVERAGE

- OUTLINE OF FIGURES IN TEXT
- OUTLINE OF ASTER SCENE COVERAGE
- OUTLINE OF 1:100,000 GEOLOGIC MAP COVERAGE
- COPPER MINE FROM 1:2,500,000 MAP (TAGHIZADEH AND MALLAKPOUR, 1976)
- COPPER OCCURRENCE FROM 1:2,500,000 MAP (TAGHIZADEH AND MALLAKPOUR, 1976)
- COPPER MINE FROM 1:100,000 GEOLOGIC MAPS
- COPPER OCCURRENCE FROM 1:100,000 GEOLOGIC MAPS
- OTHER ORES OCCURRENCE FROM 1:100,000 GEOLOGIC MAPS
- ARGILLIC ALTERATION
- PHYLLIC ALTERATION

PLATE 2

0 50 km  
N  
DATUM: WGS 1984 PROJECTION: GEOGRAPHIC LAT LONG  
LANDSAT TM 4 AND 5 DATA RESAMPLED TO 60 m SPATIAL  
RESOLUTION
